# Supplementary material for: Reactive solid phase epitaxy of layered aurivillius-type oxyfluorides Bi2TiO4F2 using polyvinylidene fluoride
Source: Royal Society of Chemistry journal article supplement (doi:10.1039/c9dt00874h), 2019-01-01
Supplement: c9dt00874h1.pdf [file c9dt00874h1.pdf]

**Supporting information for:**

**Reactive Solid Phase Epitaxy of Layered Aurivillius-type Oxyfluorides  
 $\text{Bi}_2\text{TiO}_4\text{F}_2$  using Polyvinylidene Fluoride**

Tsukasa Katayama\*, Shishin Mo, Takahiro Maruyama, Akira Chikamatsu, Tetsuya Hasegawa

Department of Chemistry, The University of Tokyo, Bunkyo-ku, Tokyo 113-0033, Japan

E-mail: katayama@chem.s.u-tokyo.ac.jp

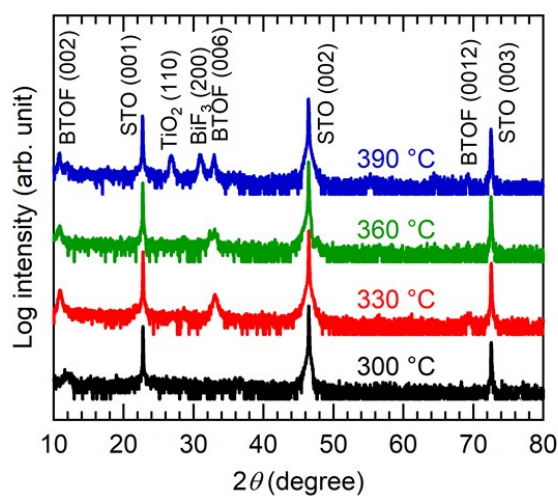

**Figure S1.** Out-of-plane XRD  $2\theta$ - $\theta$  patterns for the PVDF-treated films at 300, 330, 360 and 390 °C for 12 h under an Ar flow. BTOF and STO denote  $\text{Bi}_2\text{TiO}_4\text{F}_2$  and  $\text{SrTiO}_3$ , respectively.
